# Supplementary material for: Nucleoporin insufficiency disrupts a pluripotent regulatory circuit in a pro-arrhythmogenic stem cell line
Source: PubMed Central journal article supplement (PMC6722237; doi:10.1038/s41598-019-49147-4), 2019-09-03
Supplement: 41598_2019_49147_MOESM1_ESM.pdf [file 41598_2019_49147_MOESM1_ESM.pdf]

Nucleoporin insufficiency disrupts a pluripotent regulatory circuit  
in a pro-arrhythmogenic stem cell line

Claudia C. Preston<sup>1,‡</sup>, Emily C. Storm<sup>1,‡</sup>, Ryan D. Burdine<sup>1</sup>,  
Tyler A. Bradley<sup>1</sup>, Andrew D. Uttecht<sup>1</sup>, Randolph S. Faustino<sup>1,2\*</sup>

<sup>1</sup>Genetics and Genomics Group, Sanford Research, 2301 E. 60<sup>th</sup> Street N., Sioux Falls, SD 57104, <sup>2</sup>Department of Pediatrics, Sanford School of Medicine of the University of South Dakota, 1400 W. 22<sup>nd</sup> Street, Sioux Falls, SD 57105

## NUP155 western blot

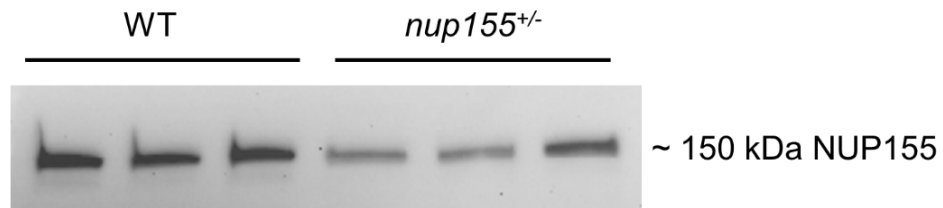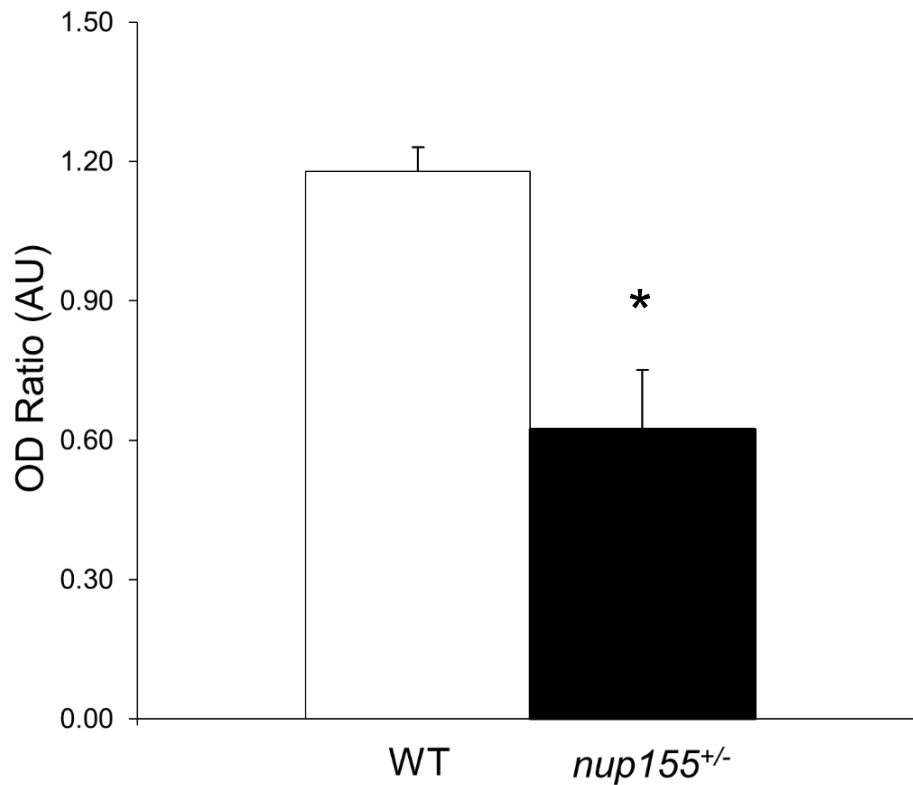

**Supplementary Figure S1:** Protein expression of NUP155 in mouse ESCs. Depicted is a western blot image (top) of NUP155 (band seen at ~150kDa) in WT (n=3) and *nup155<sup>+/-</sup>* (n=3) ESCs. Densitometric analysis (performed using Image J and normalized to  $\beta$ -tubulin) shows significant decrease in expression in *nup155<sup>+/-</sup>* ESCs (47%) when compared to WT. \* =  $p < 0.05$ . Uncropped western blot image is included in Supplementary Fig. S7.

### Impaired growth of *nup155*<sup>+/-</sup> ESCs compared to WT

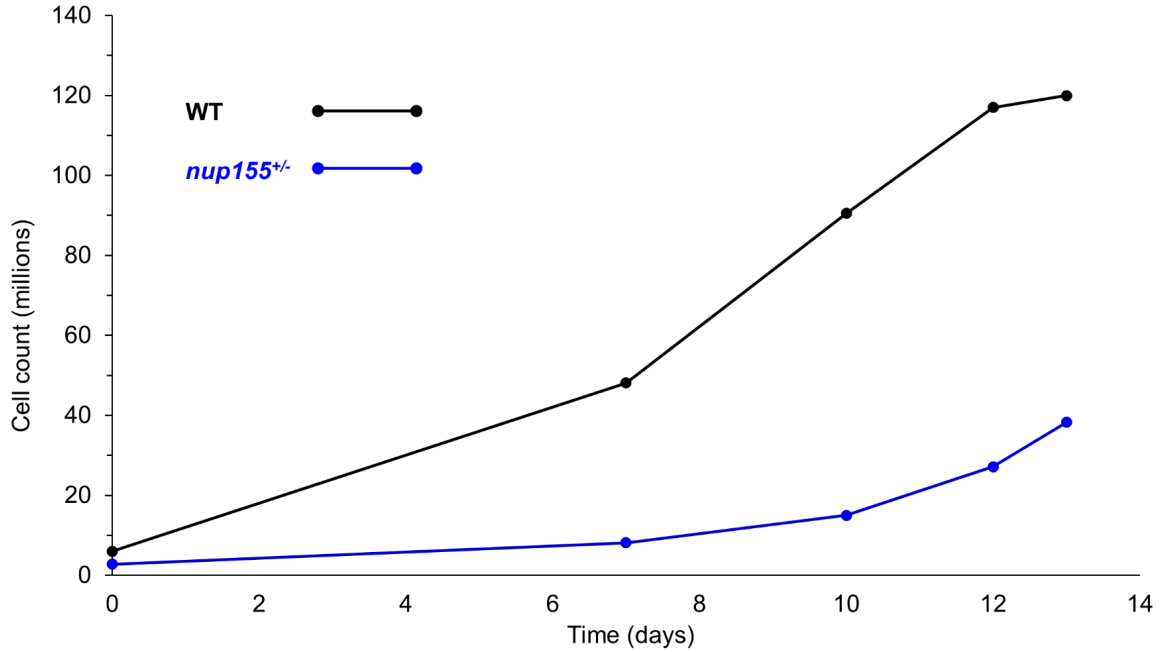

**Supplementary Figure S2:** Growth curve of mouse embryonic stem cells. (ESCs) shows impaired growth in *nup155*<sup>+/-</sup> cells compared to WT controls. Y-axis depicts the live cell count in millions, determined by Trypan Blue exclusion assays for cell viability. Cell counts were performed at time of passaging during four consecutive passages of WT ES cells (black) and *nup155*<sup>+/-</sup> ES cells (blue).

## Categorization of upregulated non-coding RNAs in *nup155*<sup>+/-</sup> ESCs

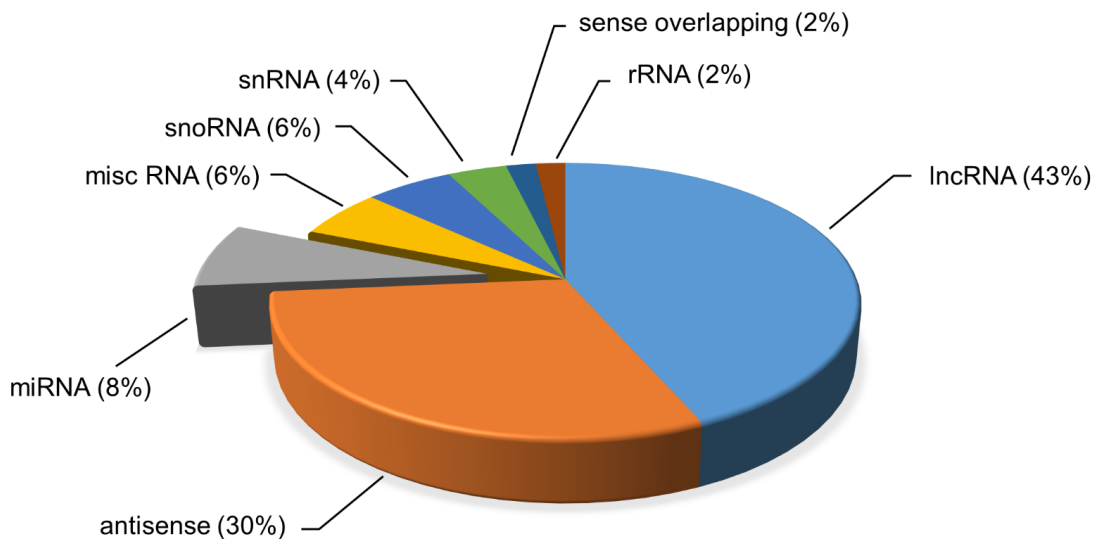

**Supplementary Figure S3:** Categorization of upregulated non-coding RNAs. Pie chart detailing percent composition of statistically significant upregulated non-coding RNAs (defined as corrected p value < 0.05) from RNAseq. There were a total of 53 significantly upregulated non-coding RNAs including 23 long non-coding RNAs (lncRNA), 16 anti-sense RNAs (antisense), 4 microRNAs (miRNA), 3 miscellaneous non-coding RNAs (misc RNA), 3 small nucleolar RNAs (snoRNAs), 2 small nuclear RNAs (snRNAs), 1 ribosomal RNA (rRNA), and 1 sense overlapping transcript. Entities categorized as pseudogenes and processed transcripts were omitted for clarity.

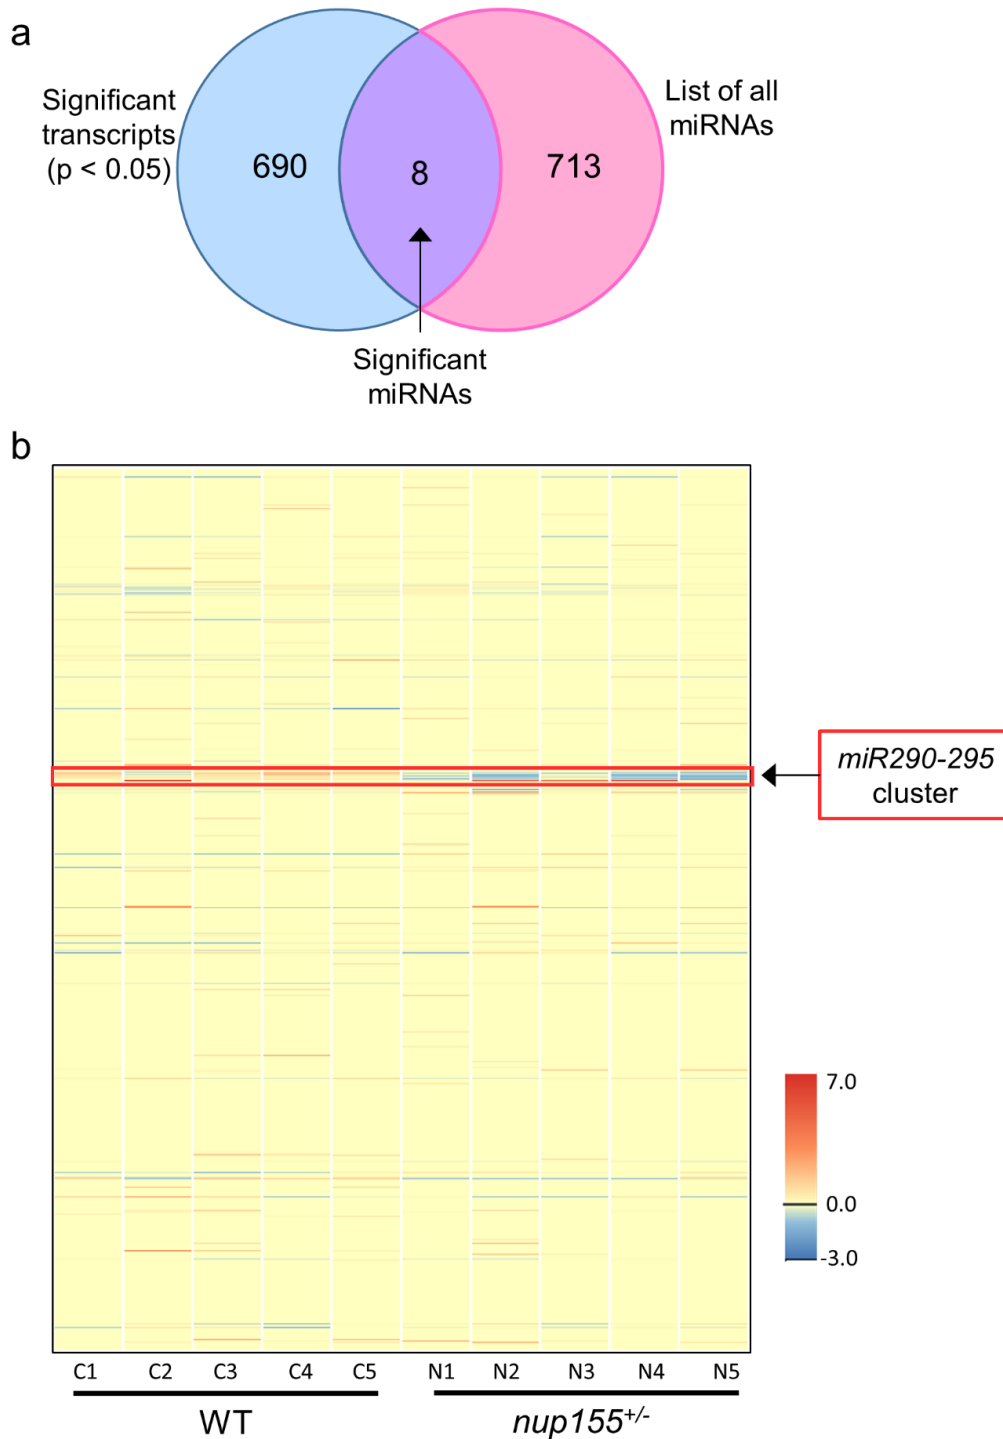

**Supplementary Figure S4:** Transcriptional signature of miRNAs in *nup155*<sup>+/-</sup> mouse ESCs. (a) Venn diagram depicting total significant transcripts in our dataset (698) intersected with all miRNAs present (721). Total significant miRNAs changing in *nup155*<sup>+/-</sup> ESCs compared with WT as indicated. (b) Heatmap representing expression of all 721 miRNAs between WT ( $n = 5$ ) and *nup155*<sup>+/-</sup> ( $n = 5$ ) ESC samples. Highlighted (red box) are the members of the *miR290-295* cluster. Color legend shows normalized fold change expression from -3.0 (blue) to 7.0 (red).

Decreased transcription of pluripotency factors in *nup155*<sup>+/-</sup> cells

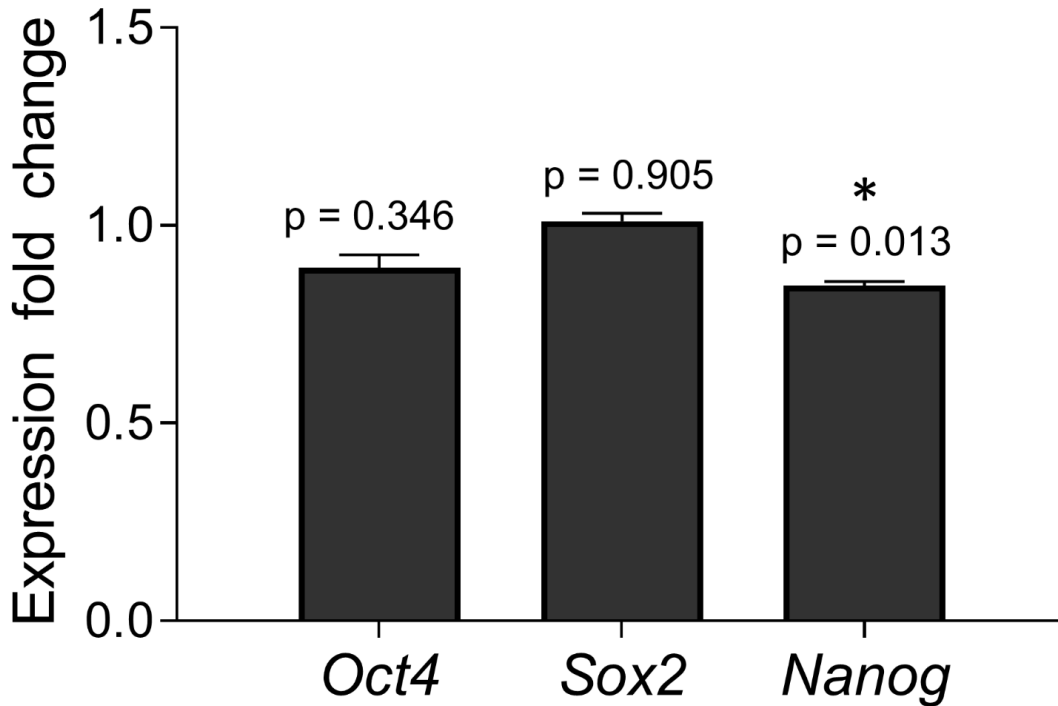

**Supplementary Figure S5:** Expression fold change of pluripotency factors in *nup155*<sup>+/-</sup> cells relative to WT. Graph depicts expression fold change ( $2^{-\Delta\Delta C_t}$ ) of pluripotency factors *Sox2*, *Oct4* and *Nanog* transcripts measured by RT-qPCR (WT n = 5; *nup155*<sup>+/-</sup> n = 5). Bar graph shows decreased expression of *Nanog* (p = 0.0131) in *nup155*<sup>+/-</sup> ES cells compared to their wild type counterparts. *Sox2* and *Oct4* transcripts did not change to a statistically significant degree. Significance was determined as p < 0.05.

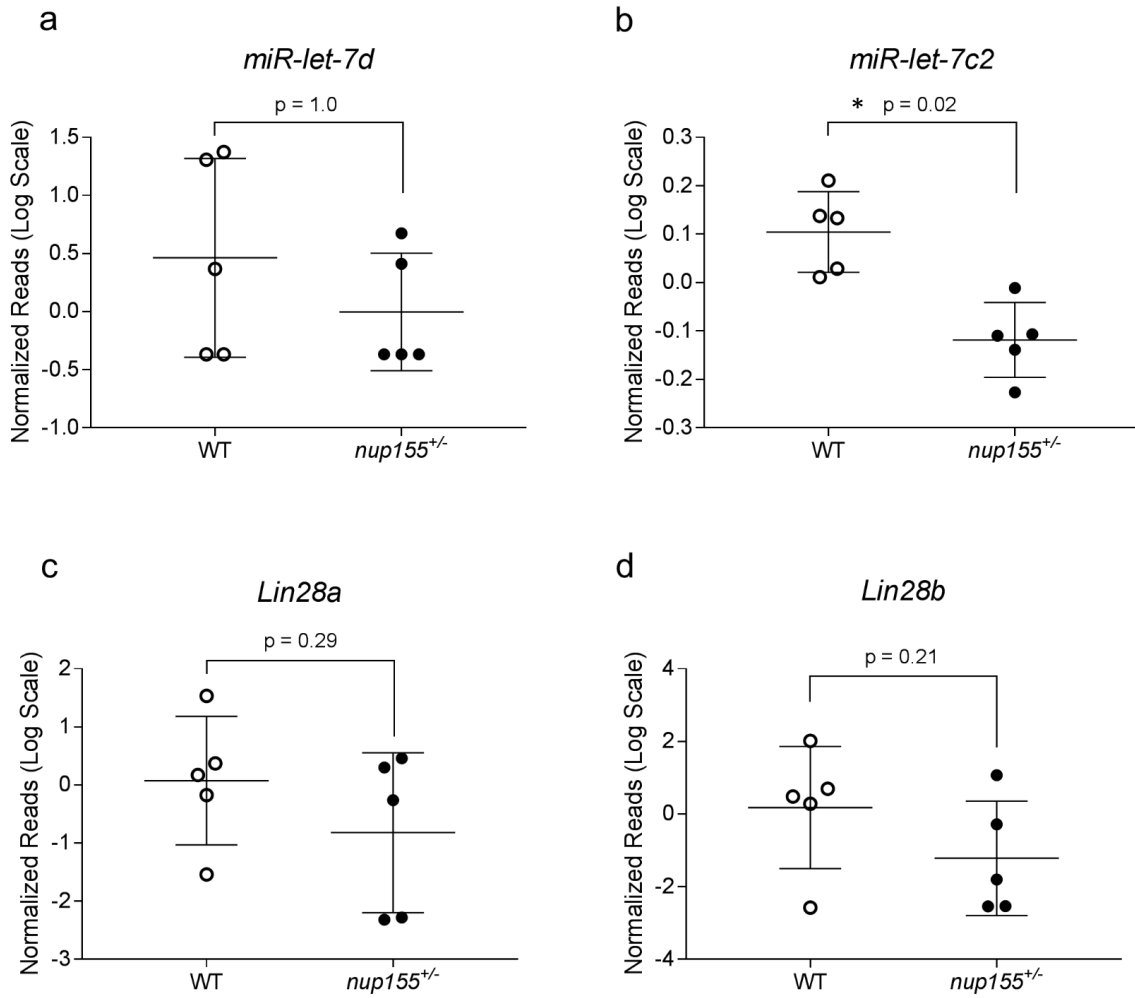

**Supplementary Figure S6:** Expression of *let7* family members. Non-significant normalized reads of *miR-let-7d*, *Lin28a* and *Lin28b* in WT and *nup155<sup>+/-</sup>* ESCs ( $p > 0.05$ ). Expression of *miR-let-7c2* in *nup155<sup>+/-</sup>* ESCs was significantly decreased when compared to WT (fold change 1.17,  $p = 0.02$ ).

## Uncropped western blot images

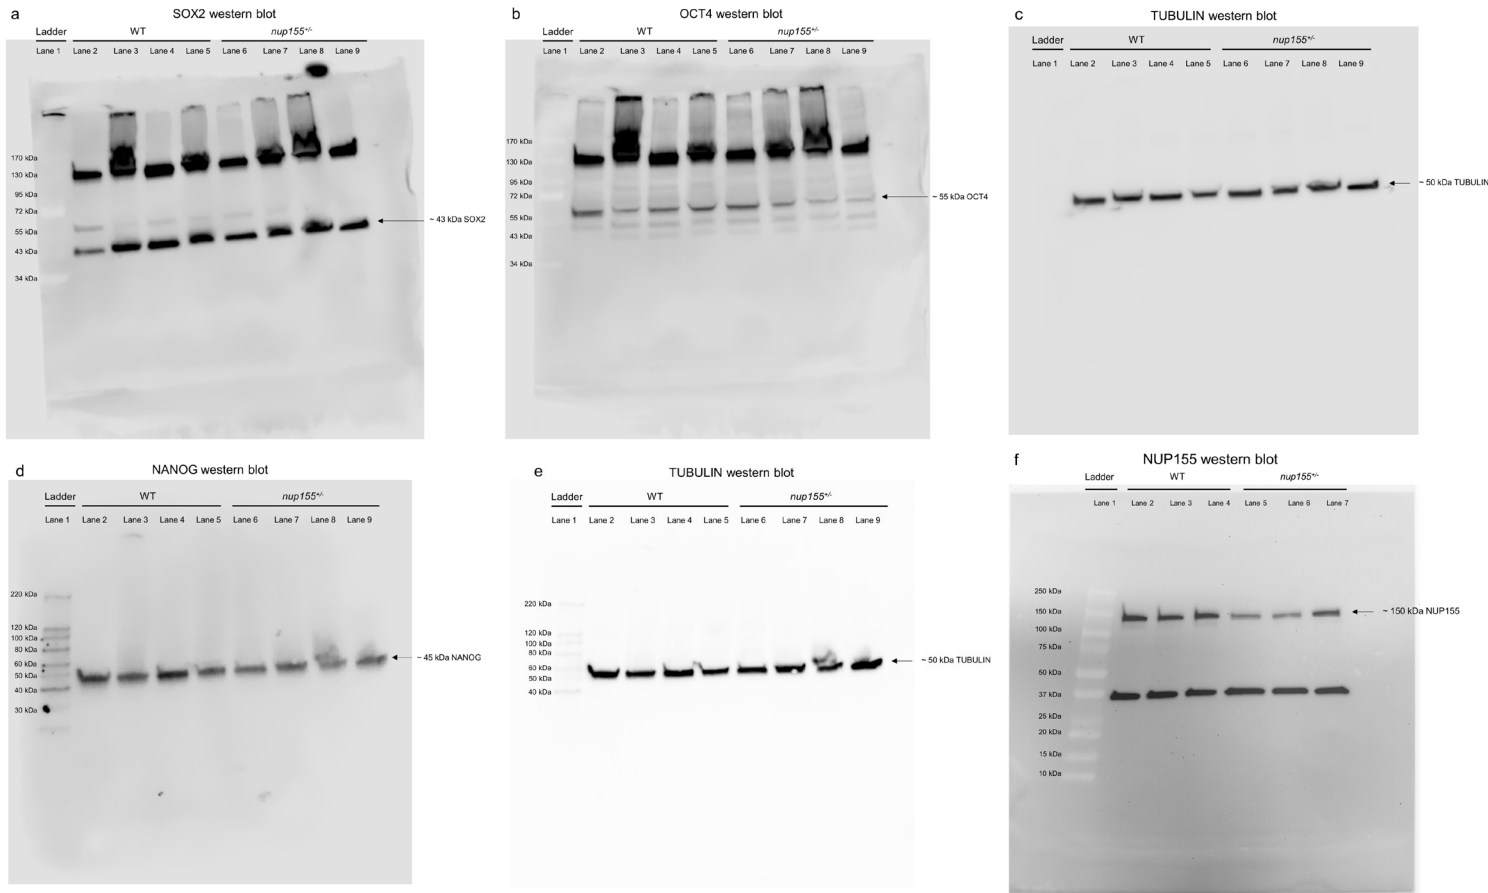

**Supplementary Figure S7:** Western blot images of mouse ESCs. WT (lanes 2-5) and *nup155*<sup>+/-</sup> (lanes 6-9) were run on a 4-10% gradient gel (100V, 60 min) with EZ-run protein ladder (lane 1) and probed for (a) SOX2 (band seen at ~43 kDa) then stripped and re-probed for (b) OCT4 (band seen at ~55 kDa). Blot was imaged individually with HRP conjugated secondary antibody. The membrane was stripped a third and final time and probed for (c) β-tubulin (50 kDa) for use as a loading control. A duplicate gel was run with MagicMark XP ladder (lane 1), and immunoblotted for (d) NANOG (~45 kDa), then stripped and probed for (e) β-tubulin (50 kDa). (f) Uncropped western blot image of NUP155 is seen here depicting WT samples in lanes 2-4 and *nup155*<sup>+/-</sup> in lanes 5-7 (Precision Plus Dual Color protein ladder in lane 1), with a predicted band at ~150 kDa. The blot was then stripped and probed for β-tubulin as loading control. Densitometric analysis was performed using ImageJ. OCT4, SOX2, NANOG and NUP155 were normalized to β-tubulin on their respective blots.



**Supplementary Table S1: Significantly altered non coding RNAs in *nup155*<sup>+/-</sup> ESCs**

|             | Gene Type | Gene Symbol          | Description                                           | Ensembl ID         | FC        | p Corr      |
|-------------|-----------|----------------------|-------------------------------------------------------|--------------------|-----------|-------------|
| Upregulated | lincRNA   | <i>D430040D24Rik</i> | RIKEN cDNA D430040D24 gene                            | ENSMUSG00000087589 | 1.4724681 | 0.001178881 |
|             | lincRNA   | <i>D330023K18Rik</i> | RIKEN cDNA D330023K18 gene                            | ENSMUSG00000087269 | 1.7457452 | 0.005554195 |
|             | lincRNA   | <i>Gm14321</i>       | predicted gene 14321                                  | ENSMUSG00000084797 | 1.4820379 | 0.01455762  |
|             | lincRNA   | <i>RP23-404J7.4</i>  | -                                                     | ENSMUSG00000097539 | 3.1235678 | 0.011057199 |
|             | lincRNA   | <i>RP23-404J7.5</i>  | -                                                     | ENSMUSG00000097299 | 3.0020168 | 0.024969164 |
|             | lincRNA   | <i>AC136729.1</i>    | -                                                     | ENSMUSG00000097183 | 1.3317534 | 0.001000993 |
|             | lincRNA   | <i>Gm11827</i>       | predicted gene 11827                                  | ENSMUSG00000086765 | 1.1660783 | 0.042046305 |
|             | lincRNA   | <i>Gm12503</i>       | predicted gene 12503                                  | ENSMUSG00000087326 | 1.7530234 | 0.004078499 |
|             | lincRNA   | <i>Abhd1</i>         | abhydrolase domain containing 1                       | ENSMUSG00000006638 | 1.6989294 | 0.01895062  |
|             | lincRNA   | <i>Wbscr25</i>       | Williams Beuren syndrome chromosome region 25 (human) | ENSMUSG00000054909 | 1.7417476 | 0.032269794 |
|             | lincRNA   | <i>AC164564.1</i>    | -                                                     | ENSMUSG00000097079 | 1.579294  | 0.00063897  |
|             | lincRNA   | <i>AC140392.2</i>    | -                                                     | ENSMUSG00000096976 | 1.9289386 | 0.003545671 |
|             | lincRNA   | <i>AC124662.1</i>    | -                                                     | ENSMUSG00000097223 | 1.2479576 | 0.008354949 |
|             | lincRNA   | <i>AC152058.2</i>    | -                                                     | ENSMUSG00000097013 | 1.1873827 | 0.006195859 |
|             | lincRNA   | <i>AC152410.1</i>    | -                                                     | ENSMUSG00000097889 | 2.7549548 | 0.023123108 |
|             | lincRNA   | <i>Gm11431</i>       | predicted gene 11431                                  | ENSMUSG00000087407 | 3.2660005 | 0.00802013  |
|             | lincRNA   | <i>Gm11769</i>       | predicted gene 11769                                  | ENSMUSG00000085636 | 1.2769991 | 0.000249433 |
|             | lincRNA   | <i>AC138303.1</i>    | -                                                     | ENSMUSG00000097902 | 3.051519  | 0.00016714  |
|             | lincRNA   | <i>AC134826.1</i>    | -                                                     | ENSMUSG00000097709 | 2.6784124 | 0.023095299 |
|             | lincRNA   | <i>AC116484.1</i>    | -                                                     | ENSMUSG00000097867 | 1.1609259 | 0.015857091 |
|             | lincRNA   | <i>AC122247.1</i>    | -                                                     | ENSMUSG00000097318 | 1.1536374 | 0.001217811 |
|             | lincRNA   | <i>AC163347.1</i>    | -                                                     | ENSMUSG00000096948 | 2.851541  | 0.001072407 |
|             | lincRNA   | <i>1600025M17Rik</i> | RIKEN cDNA 1600025M17 gene                            | ENSMUSG00000085114 | 2.171279  | 0.02288163  |
|             | antisense | <i>Gm13748</i>       | predicted gene 13748                                  | ENSMUSG00000086836 | 1.7096071 | 0.027327938 |
|             | antisense | <i>Gm13415</i>       | predicted gene 13415                                  | ENSMUSG00000085057 | 1.3930378 | 0.003980869 |
|             | antisense | <i>Gm13704</i>       | predicted gene 13704                                  | ENSMUSG00000086544 | 1.0402733 | 0.049498916 |
|             | antisense | <i>1700024P03Rik</i> | RIKEN cDNA 1700024P03 gene                            | ENSMUSG00000086186 | 1.5176938 | 0.029582342 |
|             | antisense | <i>5430417L22Rik</i> | RIKEN cDNA 5430417L22 gene                            | ENSMUSG00000074918 | 1.3054546 | 0.008127411 |
|             | antisense | <i>Gm14097</i>       | predicted gene 14097                                  | ENSMUSG00000084839 | 1.4925072 | 0.000779107 |
|             | antisense | <i>Gm16316</i>       | predicted gene 16316                                  | ENSMUSG00000087129 | 1.2248495 | 0.017290777 |
|             | antisense | <i>Gm17112</i>       | predicted gene 17112                                  | ENSMUSG00000090873 | 1.6337795 | 0.008538174 |
|             | antisense | <i>Fcor</i>          | Foxo1 corepressor                                     | ENSMUSG00000089665 | 1.0110854 | 0.020920018 |
|             | antisense | <i>Gm15816</i>       | predicted gene 15816                                  | ENSMUSG00000086741 | 1.6828485 | 0.03832272  |

|               |                   |                      |                                          |                    |            |             |
|---------------|-------------------|----------------------|------------------------------------------|--------------------|------------|-------------|
|               | antisense         | <i>Gm12228</i>       | predicted gene 12228                     | ENSMUSG00000086789 | 1.1755149  | 0.000258036 |
|               | antisense         | <i>Gm12298</i>       | predicted gene 12298                     | ENSMUSG00000072834 | 1.4753325  | 0.031967454 |
|               | antisense         | <i>Gm15911</i>       | predicted gene 15911                     | ENSMUSG00000086506 | 1.7776895  | 0.029089505 |
|               | antisense         | <i>Gm4524</i>        | predicted gene 4524                      | ENSMUSG00000090257 | 1.8096772  | 0.003922481 |
|               | antisense         | <i>1700062I23Rik</i> | RIKEN cDNA 1700062I23 gene               | ENSMUSG00000086898 | 2.6986656  | 0.009683897 |
|               | antisense         | <i>Gm16538</i>       | predicted gene 16538                     | ENSMUSG00000089766 | 1.3301628  | 0.004375643 |
|               | miRNA             | <i>AC153909.1</i>    | predicted gene, GM24303                  | ENSMUSG00000095596 | 1.058854   | 0.000426411 |
|               | miRNA             | <i>AC044807.1</i>    | predicted gene, Gm26220                  | ENSMUSG00000092956 | 1.805843   | 0.023821399 |
|               | miRNA             | <i>AC138311.1</i>    | predicted gene, Gm25068                  | ENSMUSG00000094381 | 1.7731758  | 0.040833537 |
|               | miRNA             | <i>Mir138-2</i>      | microRNA 138-2                           | ENSMUSG00000065512 | 1.8782513  | 0.003919552 |
|               | snoRNA            | <i>SNORA17</i>       | Small nucleolar RNA SNORA17              | ENSMUSG00000089591 | 1.145009   | 0.040112432 |
|               | snoRNA            | <i>SNORA17</i>       | Small nucleolar RNA SNORA17              | ENSMUSG00000088425 | 4.6787663  | 0.000695565 |
|               | snoRNA            | <i>SNORD86</i>       | Small nucleolar RNA SNORD86              | ENSMUSG00000088909 | 1.7270977  | 0.001484277 |
|               | misc_RNA          | <i>Metazoa_SRP</i>   | Metazoan signal recognition particle RNA | ENSMUSG00000092721 | 1.9833554  | 0.047319174 |
|               | misc_RNA          | <i>7SK</i>           | 7SK RNA                                  | ENSMUSG00000084547 | 2.1876316  | 0.023481824 |
|               | misc_RNA          | <i>7SK</i>           | 7SK RNA                                  | ENSMUSG00000087965 | 1.6663129  | 0.015273781 |
|               | snRNA             | <i>U6</i>            | U6 spliceosomal RNA                      | ENSMUSG00000094489 | 1.443963   | 0.021287415 |
|               | snRNA             | <i>U6</i>            | U6 spliceosomal RNA                      | ENSMUSG00000088933 | 3.7603142  | 5.8664E-05  |
|               | rRNA              | <i>5S_rRNA</i>       | 5S ribosomal RNA                         | ENSMUSG00000088384 | 3.541263   | 0.001146871 |
|               | sense overlapping | <i>Gm20644</i>       | predicted gene 20644                     | ENSMUSG00000093673 | 1.0921067  | 0.006876831 |
| Downregulated | lincRNA           | <i>Gm13025</i>       | predicted gene 13025                     | ENSMUSG00000086159 | -1.0466666 | 0.04115335  |
|               | lincRNA           | <i>AC110567.1</i>    | -                                        | ENSMUSG00000097368 | -1.3065866 | 0.000250179 |
|               | lincRNA           | <i>AI480526</i>      | expressed sequence AI480526              | ENSMUSG00000090086 | -2.4544034 | 0.003316961 |
|               | lincRNA           | <i>Gm15567</i>       | predicted gene 15567                     | ENSMUSG00000084974 | -1.0093324 | 0.001714023 |
|               | lincRNA           | <i>4933406I18Rik</i> | RIKEN cDNA 4933406I18 gene               | ENSMUSG00000087475 | -1.4427004 | 0.000988401 |
|               | lincRNA           | <i>AC113484.1</i>    | -                                        | ENSMUSG00000096938 | -2.069057  | 0.005108806 |
|               | lincRNA           | <i>AC131780.3</i>    | -                                        | ENSMUSG00000097312 | -1.8341787 | 0.002462086 |
|               | lincRNA           | <i>4930520O04Rik</i> | RIKEN cDNA 4930520O04 gene               | ENSMUSG00000074039 | -1.2448175 | 0.012427459 |
|               | lincRNA           | <i>Gm11946</i>       | predicted gene 11946                     | ENSMUSG00000087291 | -1.4263265 | 0.01559487  |
|               | lincRNA           | <i>4933405E24Rik</i> | RIKEN cDNA 4933405E24 gene               | ENSMUSG00000086209 | -1.6460853 | 0.03286364  |
|               | lincRNA           | <i>1700121N20Rik</i> | RIKEN cDNA 1700121N20 gene               | ENSMUSG00000092066 | -2.7382588 | 0.025925819 |
|               | lincRNA           | <i>AC173345.2</i>    | -                                        | ENSMUSG00000097849 | -1.856952  | 0.008906752 |
|               | lincRNA           | <i>AC209577.1</i>    | -                                        | ENSMUSG00000097576 | -1.1437159 | 0.040588282 |
|               | lincRNA           | <i>AC154449.1</i>    | -                                        | ENSMUSG00000097768 | -1.8573279 | 0.001016078 |
|               | lincRNA           | <i>AC154507.1</i>    | -                                        | ENSMUSG00000097624 | -2.2740648 | 0.010717467 |
|               | lincRNA           | <i>AC145591.1</i>    | -                                        | ENSMUSG00000097755 | -1.2007959 | 0.03728475  |
|               | lincRNA           | <i>AC132389.1</i>    | -                                        | ENSMUSG00000097930 | -2.0905662 | 0.001447383 |
|               | antisense         | <i>Gm13362</i>       | predicted gene 13362                     | ENSMUSG00000086418 | -1.4526129 | 0.02259383  |
|               | antisense         | <i>Gm13619</i>       | predicted gene 13619                     | ENSMUSG00000052865 | -2.0839705 | 0.002798275 |

|                   |                      |                                                  |                    |            |             |
|-------------------|----------------------|--------------------------------------------------|--------------------|------------|-------------|
| antisense         | <i>Pax6os1</i>       | Pax6 opposite strand transcript 1                | ENSMUSG00000086029 | -1.3452741 | 0.039596412 |
| antisense         | <i>Gm13165</i>       | predicted gene 13165                             | ENSMUSG00000086654 | -1.5925248 | 0.02910456  |
| antisense         | <i>Gm15792</i>       | predicted gene 15792                             | ENSMUSG00000085606 | -2.435628  | 0.00059366  |
| antisense         | <i>RP23-271G7.3</i>  | -                                                | ENSMUSG00000097484 | -1.0683532 | 0.04313622  |
| antisense         | <i>4933424L21Rik</i> | RIKEN cDNA 4933424L21 gene                       | ENSMUSG00000085719 | -1.4564387 | 0.044925485 |
| antisense         | <i>C78197</i>        | expressed sequence C78197                        | ENSMUSG00000087242 | -3.0287738 | 0.037046853 |
| antisense         | <i>Gm11725</i>       | predicted gene 11725                             | ENSMUSG00000085434 | -1.03535   | 0.001938904 |
| antisense         | <i>C87198</i>        | expressed sequence C87198                        | ENSMUSG00000092515 | -1.4548206 | 0.000460192 |
| antisense         | <i>1110046J04Rik</i> | RIKEN cDNA 1110046J04 gene                       | ENSMUSG00000085457 | -3.2520156 | 0.000140369 |
| antisense         | <i>Gm17116</i>       | predicted gene 17116                             | ENSMUSG00000090785 | -1.1741812 | 0.004966831 |
| antisense         | <i>Gm16191</i>       | predicted gene 16191                             | ENSMUSG00000087693 | -1.2607583 | 0.013894445 |
| antisense         | <i>Gm16194</i>       | predicted gene 16194                             | ENSMUSG00000084956 | -1.5119123 | 0.001481907 |
| antisense         | <i>Gm17080</i>       | predicted gene 17080                             | ENSMUSG00000067389 | -1.5519352 | 0.008406733 |
| miRNA             | <i>Mir291a</i>       | microRNA 291a                                    | ENSMUSG00000078008 | -1.7085884 | 0.002841814 |
| miRNA             | <i>Mir291b</i>       | microRNA 291b                                    | ENSMUSG00000078032 | -1.4041032 | 0.009981588 |
| miRNA             | <i>Mir293</i>        | microRNA 293                                     | ENSMUSG00000078035 | -1.043071  | 0.018788872 |
| miRNA             | <i>Mir294</i>        | microRNA 294                                     | ENSMUSG00000077903 | -1.153563  | 0.034180004 |
| snoRNA            | <i>SNORA29</i>       | Small nucleolar RNA SNORA29                      | ENSMUSG00000065105 | -1.064001  | 0.003222728 |
| misc RNA          | <i>7SK</i>           | 7SK RNA                                          | ENSMUSG00000089475 | -1.0603285 | 0.003452227 |
| misc RNA          | <i>Metazoa_SRP</i>   | Metazoan signal recognition particle RNA         | ENSMUSG00000093369 | -1.2043077 | 0.018946713 |
| snRNA             | <i>U6</i>            | U6 spliceosomal RNA                              | ENSMUSG00000064919 | -1.5618181 | 0.000779107 |
| snRNA             | <i>U6</i>            | U6 spliceosomal RNA                              | ENSMUSG00000089080 | -1.0309738 | 0.002153195 |
| non coding        | <i>Sox2ot</i>        | SOX2 overlapping transcript (non-protein coding) | ENSMUSG00000090828 | -1.9579431 | 0.002018809 |
| sense overlapping | <i>Gm20712</i>       | predicted gene 20712                             | ENSMUSG00000093677 | -1.2783619 | 0.007524139 |

**Supplementary Table S1.** Table listing all non-coding RNA entities with statistically significant changes in *nup155*<sup>+/-</sup> embryonic stem cells compared to wild type controls. Pseudogenes and processed transcripts were omitted for clarity. Listed are the Gene Type, Gene Symbol, Gene Description from Mouse GENCODE database v17, Ensembl ID, Fold Change (FC), and corrected p value (p Corr) for each entity. Dashes denote entities which did not have a description at time of accession. Pseudogenes and processed transcripts were omitted for clarity.

**Supplementary Table S2: Antibodies used in western blot and immunocytochemistry studies.**

|                  | Antibody         | Host Species | Working Dilution           | RRID #      | Catalog Number | Manufacturer                              |
|------------------|------------------|--------------|----------------------------|-------------|----------------|-------------------------------------------|
| <b>Primary</b>   | SOX2             | Goat         | 1:200 (WB)                 | AB_355110   | AF2018         | R&D systems (Minneapolis, MN)             |
|                  | SOX2             | Rabbit       | 1:100 (ICC)                | AB_10585428 | ab92494        | Abcam (Cambridge, UK)                     |
|                  | NANOG            | Rabbit       | 1:1000 (WB)<br>1:200 (ICC) | AB_386109   | A300-398A      | Bethyl Laboratories Inc. (Montgomery, TX) |
|                  | OCT4             | Rabbit       | 1:150 (WB)<br>1:200 (ICC)  | AB_445175   | ab19857        | Abcam (Cambridge, UK)                     |
|                  | NUP155           | Rabbit       | 1:1000 (WB)                | *           | NBP2-22286     | Novus Biologicals (Centennial, CO)        |
|                  | $\beta$ -TUBULIN | Rabbit       | 1:1000                     | AB_2210370  | ab6046         | Abcam (Cambridge, UK)                     |
|                  | LAMIN B1         | Chicken      | 1:250                      | AB_10674021 | ab90169        | Abcam (Cambridge, UK)                     |
| <b>Secondary</b> | HRP              | Goat         | 1:8000                     | AB_2313567  | 111-035-003    | Jackson ImmunoResearch (West Grove, PA)   |
|                  | HRP              | Rabbit       | 1:8000                     | AB_2796231  | 6160-05        | SouthernBiotech (Birmingham, AL)          |
|                  | Alexa Fluor 594  | Goat         | 1:500                      | AB_2534095  | A11037         | Fisher/Invitrogen (Waltham, MA)           |
|                  | Alexa Fluor 488  | Goat         | 1:500                      | AB_2633280  | A32731         | Fisher/Invitrogen (Waltham, MA)           |

**Supplementary Table S2:** Table listing details of antibodies used in western blot and immunocytochemistry experiments. Working dilutions used were from manufacturer concentrations, diluted with 1% non-fat powdered milk in TBST. Resource Identification Initiative number (RRID #) was also included, extracted from the antibody registry database (<http://antibodyregistry.org/>). \*Did not have an RRID#, catalog number is provided for anti-NUP155 (Novus Biologicals). HRP= Horseradish peroxidase, WB= West Blot, ICC= Fluorescent Immunocytochemistry.
